# Supplementary material
Source: PubMed Central journal article supplement (PMC2614162)
Supplement: rsbl20080388s03.pdf [file rsbl20080388s03.pdf]

## Electronic Appendix 2

*Cosinor analysis* (cf. Nelson *et al.* 1979)

Circadian rhythmicity of the intensity of locomotor activity was validated by performing cosinor tests within a period range of 20 to 28 h, using the program COSINOR provided by the Circadian Rhythm Laboratory, Walterboro, USA (<http://www.circadian.org/software.html>). The intensity of locomotor activity was derived from the number of captured images (equivalent to the number of body movements) within fixed 0.1 hour intervals. Individual variation of circadian rhythms was estimated by calculating period, acrophase (phase angle), amplitude and mesor (see figure). Cosinor analysis confirmed statistically significant circadian rhythms in 15 individual redstarts (see table below).

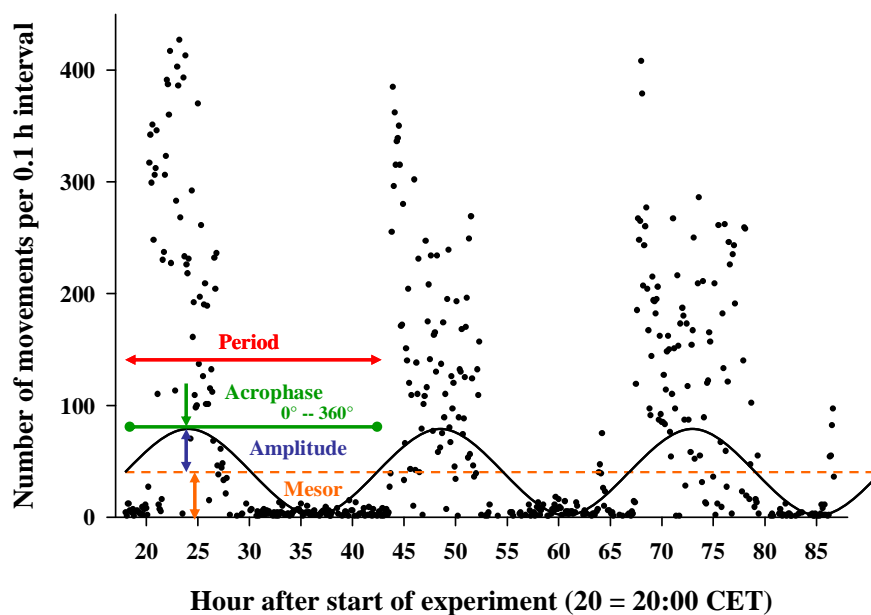

| Indiv. | Period (h) | Acrophase (degree) | Amplitude (count) | Mesor (count) | F     | p       |
|--------|------------|--------------------|-------------------|---------------|-------|---------|
| 1      | 20.5       | 104                | 38.6              | 25.6          | 47.9  | < 0.001 |
| 2      | 23.9       | 98                 | 90.8              | 52.7          | 147.2 | < 0.001 |
| 3      | 24.5       | 98                 | 68.4              | 37            | 119   | < 0.001 |
| 4      | 21.5       | 103                | 36                | 24.4          | 47.1  | < 0.001 |
| 5      | 21.7       | 103                | 60                | 32.8          | 133.8 | < 0.001 |
| 6      | 21.6       | 105                | 36.7              | 25.5          | 62    | < 0.001 |
| 7      | 22.8       | 97                 | 51.4              | 27.3          | 85.5  | < 0.001 |
| 8      | 22.5       | 111                | 11                | 10.7          | 50.8  | < 0.001 |
| 9      | 22.2       | 102                | 84.8              | 45.9          | 104   | < 0.001 |
| 10     | 22.6       | 103                | 69.7              | 38            | 83    | < 0.001 |
| 11     | 23.3       | 100                | 61.4              | 34.6          | 102.9 | < 0.001 |
| 12     | 22.9       | 103                | 60.3              | 39.3          | 110   | < 0.001 |
| 13     | 21.9       | 104                | 77.3              | 48.6          | 132.9 | < 0.001 |
| 14     | 21.8       | 102                | 55.8              | 30.8          | 75.7  | < 0.001 |
| 15     | 23.1       | 108                | 42.9              | 26.2          | 26.2  | < 0.001 |

## Reference

Nelson, W., Tong, Y. L., Lee, J. K. & Halberg, F. 1979 Methods for cosinor rhythmometry. *Chronobiology* **6**, 305-323.
